# Supplementary material
Source: Springer Nature journal article supplement (https://www.springermedizin.de/resource/supplementary/12893_2008_129_MOESM2_ESM.pdf/9513044)

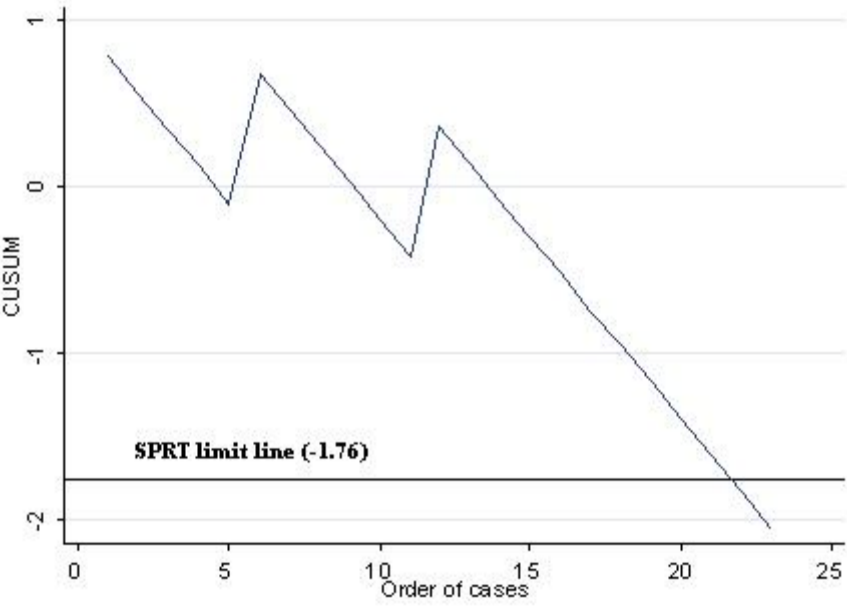

Supplement: MOESM2 [file 9513044]
